# Supplementary material for: Live Oral Adenovirus Type 4 and Type 7 Vaccine Induces Durable Antibody Response
Source: PubMed Central journal article supplement (PMC7564809; doi:10.3390/vaccines8030411), 2020-07-23
Supplement: vaccines-08-00411-s001.pdf [file vaccines-08-00411-s001.pdf]

**Table 1.** Neutralizing antibody titer for all subjects at baseline and following live oral adenovirus-4 and adenovirus-7 vaccination.

| Subject | Adenovirus-4    |                 |           |           | Adenovirus-7    |                 |           |           |
|---------|-----------------|-----------------|-----------|-----------|-----------------|-----------------|-----------|-----------|
|         | Pre-vaccination | >30 Days-1 Year | 2-3 Years | 5-6 Years | Pre-vaccination | >30 Days-1 Year | 2-3 Years | 5-6 Years |
| ADV001  | 6               | 23              | 23        | 63        | 12              | 169             | 102       | 49        |
| ADV002  | 4               | 31              | 23        | 49        | 14              | 175             | 282       | 33 *      |
| ADV003  | 6               | 23              | 23        | 47        | <4              | 16              | 16        | 8         |
| ADV004  | 16              | 31              | 63        | 65        | <4              | 248             | 128       | 256       |
| ADV005  | 4               | 63              | 49        | 126       | 6               | 248             | 363       | 270       |
| ADV006  | 12              | 131             | 126       | 270       | 1005            | 1045            | 1167      | 741       |
| ADV007  | 6               | 12              | 12        | 16        | 6               | 23              | 63        | 31        |
| ADV008  | 4               | 128             | 63        | 46        | 73              | 49              | 362       | 502       |
| ADV009  | <4              | 270             | 270       | 393       | <4              | 45              | 128       | 63        |
| ADV010  | 128             | 393             | 1000      | 393       | 6               | 8               | 12        | 8         |
| ADV011  | 65              | 270             | 270       | 393       | 63              | 270             | 102       | 270       |
| ADV012  | 4               | 393             | 393       | 393       | 393             | 393             | 393       | 393       |
| ADV013  | <4              | 102             | 131       | 49        | 8               | 169             | 256       | 128       |
| ADV014  | 6               | 49              | 23        | 23        | <4              | 126             | 65        | 128       |
| ADV015  | 393             | 393             | 393       | 270       | 61              | 262             | 73        | 131       |
| ADV016  | 102             | 393             | 393       | 251       | 362             | 256             | 128       | 256       |
| ADV017  | 12              | 131             | 270       | 102       | <4              | 8               | 8         | 8         |
| ADV018  | 6               | 126             | 65        | 65        | <4              | 61              | 37        | 63        |
| ADV019  | 6               | 98              | 49        | 49        | 270             | 128             | 182       | 256       |
| ADV020  | 126             | 270             | 270       | 131       | 8               | 47              | 18        | 126 **    |
| ADV021  | 126             | 128             | 126       | 270       | 16              | 15              | 23        | 34        |
| ADV022  | 6               | 12              | 12        | 8         | 8               | 47              | 49        | 33        |
| ADV023  | 65              | 393             | 393       | 393       | 175             | 128             | 270       | 128       |
| ADV024  | 12              | 49              | 23        | 33        | 393             | 270             | 270       | 270       |
| ADV025  | 102             | 393             | 393       | 393       | 12              | 49              | 94        | 270       |
| ADV026  | 6               | 393             | 270       | 131       | 16              | 270             | 128       | 270       |
| ADV027  | 4               | 63 **           | 393       | 131       | <4              | 65              | 49        | 33        |
| ADV028  | 270             | 393             | 393       | 393       | 47              | 63              | 73        | 91        |
| ADV029  | 4               | 98              | 65        | 65        | 8               | 65              | 294 **    | 131       |
| ADV030  | 8               | 73              | 270       | 393       | 4               | 54              | 282 **    | 270       |
| ADV031  | <4              | 23              | 23        | 23        | 23              | 131             | 102       | 175       |
| ADV032  | 23              | 33              | 31        | 49        | <4              | 270             | 63 *      | 102       |
| ADV033  | <4              | 23              | 23        | 33        | 502             | 393             | 393       | 502       |
| ADV034  | 270             | 126             | 126       | 98        | 11              | 75              | 169       | 256       |
| ADV035  | 131             | 126             | 126       | 270       | <4              | 16              | 9         | 23        |
| ADV036  | <4              | 33              | 33        | 279 **    | <4              | 65              | 61        | 96        |
| ADV037  | 270             | 393             | 393       | 502       | 33              | 502             | 256       | 393       |
| ADV038  | <4              | 33              | 49        | 23        | 4               | 47              | 63        | 49        |
| ADV039  | <4              | 16              | 12        | 12        | 63              | 270             | 362       | 256       |
| ADV040  | 270             | 270             | 126       | 131       | 47              | 126             | 175       | 270       |
| ADV041  | <4              | 12              | 8         | 8         | 270             | 393             | 393       | 270       |
| ADV042  | 23              | 33              | 23        | 33        | 33              | 31              | 41        | 34        |
| ADV043  | 23              | 23              | 33        | 65        | 34              | 270             | 128       | 65        |
| ADV044  | 393             | 270             | 270       | 393       | 6               | 33              | 23        | 62        |
| ADV045  | 49              | 128             | 98        | 126       | 11              | 131             | 65        | 47        |
| ADV046  | <4              | 16              | 23        | 31        | 6               | 32              | 270 **    | 36 *      |

|        |    |    |    |    |     |     |     |     |
|--------|----|----|----|----|-----|-----|-----|-----|
| ADV047 | <4 | 16 | 23 | 23 | <4  | <4  | 4   | <4  |
| ADV048 | 49 | 98 | 49 | 49 | 16  | 26  | 34  | 31  |
| ADV049 | <4 | 12 | 23 | 23 | 6   | 169 | 63  | 16  |
| ADV050 | <4 | 23 | 23 | 23 | <4  | 180 | 54  | 58  |
| ADV051 | <4 | 65 | 65 | 49 | <4  | 63  | 31  | 16  |
| ADV052 | <4 | 12 | 6  | 12 | <4  | 23  | 23  | 49  |
| ADV053 | <4 | 33 | 23 | 23 | <4  | 270 | 130 | 175 |
| ADV054 | <4 | 16 | 12 | 12 | <4  | <4  | <4  | <4  |
| ADV055 | <4 | 16 | 23 | 16 | 12  | 270 | 131 | 126 |
| ADV056 | 63 | 49 | 98 | 98 | 4   | 34  | 14  | 45  |
| ADV057 | 4  | 63 | 49 | 33 | 270 | 131 | 128 | 62  |
| ADV058 | <4 | 23 | 16 | 16 | <4  | 73  | 49  | 98  |
| ADV059 | 23 | 98 | 63 | 63 | <4  | 270 | 270 | 272 |
| ADV060 | 49 | 65 | 65 | 63 | 31  | 126 | 65  | 169 |

\* 4-fold decreased from previous time point that are within dilution range of 1:4 to 1:8195. \*\* 4-fold increase from previous time point that are within dilution range of 1:4 to 1:8195.
